# Supplementary material for: Interactions between pluripotency factors specifycis-regulation in embryonic stem cells
Source: HighWire-hosted journal article supplement (doi:10.1101/gr.200733.115), 2016-04-15
Supplement: Supp_Information_S1.docx [file Supp_Information_S1.docx]

Supplemental Data

**Supplemental Data S1: Expression of CREs in the OSKE library.** In CRE names: ‘O’ indicates POU5F1 (OCT4) binding sites, ‘S’ indicates SOX2 binding sites, ‘K’ indicated KLF4 binding sites, and ‘E’ indicates ESRRB binding sites. Lower-case letters are in the reverse-orientation. SEM is standard error of the mean.

**Supplemental Data S2: Expression of CREs in the KBS library.** The same notation for CREs as in ‘Supplemental Data 1’ is used.

**Supplemental Data S3: Read counts of BCs and CREs in the OSKE library.** The same notation for CREs as in ‘Supplemental Data 1’ is used.

**Supplemental Data S4: Read counts of BCs and CREs in the KBS library.** Each BC was in one of two sets, each of which was run and normalized separately.

| **Name** | **Sequence** |
| --- | --- |
| BS300_KK_upper | CAAGCTACGGGGTGGGGCCGCTAGCTACGGGGTGGGGCCGCT |
| BS301_KK_lower | AGCTAGCGGCCCCACCCCGTAGCTAGCGGCCCCACCCCGTAGCTTGGGCC |
| BS302_K_lower | AGCTAgcggccccacccCGTAGCTTGGGCC |
| BS302_K_upper | caagctacgGGGTGGGGCCGCt |
| BS303_KKKK_lower | agctaGCGGCCCCACCCcgtagctaGCGGCCCCACCCcgtagctaGCGGCCCCACCCcgtagctaGCGGCCCCACCCcgtagcttgggcc |
| BS303_KKKK_upper | caagctacgGGGTGGGGCCGCtagctacgGGGTGGGGCCGCtagctacgGGGTGGGGCCGCtagctacgGGGTGGGGCCGCt |
| BS306_KKK_lower | agctaGCGGCCCCACCCcgtagctaGCGGCCCCACCCcgtagctaGCGGCCCCACCCcgtagcttgggcc |
| BS306_KKK_upper | caagctacgGGGTGGGGCCGCtagctacgGGGTGGGGCCGCtagctacgGGGTGGGGCCGCt |
| BS307_Kx5_lower | agctaGCGGCCCCACCCcgtagctaGCGGCCCCACCCcgtagctaGCGGCCCCACCCcgtagctaGCGGCCCCACCCcgtagctaGCGGCCCCACCCcgtagcttgggcc |
| BS307_Kx5_upper | caagctacgGGGTGGGGCCGCtagctacgGGGTGGGGCCGCtagctacgGGGTGGGGCCGCtagctacgGGGTGGGGCCGCtagctacgGGGTGGGGCCGCt |
| BS308_Kx6_lower | agctaGCGGCCCCACCCcgtagctaGCGGCCCCACCCcgtagctaGCGGCCCCACCCcgtagctaGCGGCCCCACCCcgtagctaGCGGCCCCACCCcgtagctaGCGGCCCCACCCcgtagcttgggcc |
| BS308_Kx6_upper | caagctacgGGGTGGGGCCGCtagctacgGGGTGGGGCCGCtagctacgGGGTGGGGCCGCtagctacgGGGTGGGGCCGCtagctacgGGGTGGGGCCGCtagctacgGGGTGGGGCCGCt |
| CF48 | CTAGACTNNNNNNNNNNNNCCGAGCT |
| CF49 | CGGNNNNNNNNNNNNAGT |
| CF52 | AATGATACGGCGACCACCGAG |
| CF53 | CAAGCAGAAGACGGCATACGA |
| CF84 | CGAAGTCTGAAGCCAGGTGT |
| CF90 | TCGACGTCaagcttATTGGCACACGAACATTCAA |
| CF121 | TAGCGTCGAGGACATCAAGA |
| CF122 | TGGTTTGTCCAAACTCATCAA |
| CF134 | TCATGTATaagcttTAATGCATGGCGGTAATACG |
| CF135 | TTAGTTtcatgaTGATCAGATCCGAAAATGGA |
| CF150 | TACACCGTGGTGGAGCAGTA |
| CF151b | AGCGTActcgagTTGTTAACTTGTTTATTGCAGCTT |
| CF159 | ACTACAAGGGCCCAAGC |
| CF160 | CGTAGGAGTTGCAGAGCTC |
| P1_XbaI_BC7_R | /5Phos/C*TAGAGACTGAAGATCGGAAGAGCGTCGTGTAGGGAAAGAGTGTAGATCTCGGTGGTCGCCGTATCATT |
| P1_XbaI_BC8_R | /5Phos/C*TAGCTTGGAAAGATCGGAAGAGCGTCGTGTAGGGAAAGAGTGTAGATCTCGGTGGTCGCCGTATCATT |
| P1_XbaI_BC9_R | /5Phos/C*TAGCCGATTAAGATCGGAAGAGCGTCGTGTAGGGAAAGAGTGTAGATCTCGGTGGTCGCCGTATCATT |
| P1_XbaI_BC10_R | /5Phos/C*TAGGGCAGCGAGATCGGAAGAGCGTCGTGTAGGGAAAGAGTGTAGATCTCGGTGGTCGCCGTATCATT |
| P1_XbaI_BC11_R | /5Phos/C*TAGCCATCATAGATCGGAAGAGCGTCGTGTAGGGAAAGAGTGTAGATCTCGGTGGTCGCCGTATCATT |
| P1_XbaI_BC12_R | /5Phos/C*TAGTAACAAGAGATCGGAAGAGCGTCGTGTAGGGAAAGAGTGTAGATCTCGGTGGTCGCCGTATCATT |
| P1_XbaI_BC13_R | /5Phos/C*TAGTCGTAACTAGATCGGAAGAGCGTCGTGTAGGGAAAGAGTGTAGATCTCGGTGGTCGCCGTATCATT |
| P1_XbaI_BC14_R | /5Phos/C*TAGGCAGCTATGAGATCGGAAGAGCGTCGTGTAGGGAAAGAGTGTAGATCTCGGTGGTCGCCGTATCATT |
| P1_XbaI_BC15_R | /5Phos/C*TAGCAATCAAGTCAGATCGGAAGAGCGTCGTGTAGGGAAAGAGTGTAGATCTCGGTGGTCGCCGTATCATT |
| P1_XbaI_BC7_F | AATGATACGGCGACCACCGAGATCTACACTCTTTCCCTACACGACGCTCTTCCGATCTTCAGTCT |
| P1_XbaI_BC8_F | AATGATACGGCGACCACCGAGATCTACACTCTTTCCCTACACGACGCTCTTCCGATCTTTCCAAG |
| P1_XbaI_BC9_F | AATGATACGGCGACCACCGAGATCTACACTCTTTCCCTACACGACGCTCTTCCGATCTTAATCGG |
| P1_XbaI_BC10_F | AATGATACGGCGACCACCGAGATCTACACTCTTTCCCTACACGACGCTCTTCCGATCTCGCTGCC |
| P1_XbaI_BC11_F | AATGATACGGCGACCACCGAGATCTACACTCTTTCCCTACACGACGCTCTTCCGATCTATGATGG |
| P1_XbaI_BC12_F | AATGATACGGCGACCACCGAGATCTACACTCTTTCCCTACACGACGCTCTTCCGATCTCTTGTTA |
| P1_XbaI_BC13_F | AATGATACGGCGACCACCGAGATCTACACTCTTTCCCTACACGACGCTCTTCCGATCTAGTTACGA |
| P1_XbaI_BC14_F | AATGATACGGCGACCACCGAGATCTACACTCTTTCCCTACACGACGCTCTTCCGATCTCATAGCTGC |
| P1_XbaI_BC15_F | AATGATACGGCGACCACCGAGATCTACACTCTTTCCCTACACGACGCTCTTCCGATCTGACTTGATTG |
| P2_XhoI_F | /5Phos/T*CGAAGATCGGAAGAGCTCGTATGCCGTCTTCTGCTTG |
| P2_XhoI_R | CAAGCAGAAGACGGCATACGAGCTCTTCCGATCT |

**Supplemental Information S1: Sequences used.** Sequences for primers and other oligos used in this study.

Supplemental Figures

**Supplemental Fig S1: OSKE CRE-seq library.** A) Layout of the 20bp sequence building blocks containing the TF binding sites. B) Schematic of the members of the CRE-seq plasmid library. C) Representative scatter plot of the reproducibility of the CRE-seq expression between two biological replicates.

**Supplemental Fig S2: Interaction rules in statistical thermodynamic model of transcription.** The weights of each possible binding state of a CRE are based on the possible interactions between TFs. Interaction rules dictate which TFs are allowed to interact, as shown here for a CRE with three TFBS and a subset of possible binding states. Each oval is one TF.

**Supplemental Fig S3: Enriched TF binding near interacting partners.** Binding of TFs determined by genomic ChIP-seq data (Chen et al 2008) are likely to be close to predicted binding sites based on a PWM for interacting partners. The red lines represent binding based on distance to nearest PWM for each TF. The black lines represent binding based on distance to nearest permuted PWMs for reach TF, with the line representing the mean over 10 shuffled PWMS and the ribbon representing the standard deviation. Shown for A) SOX2 binding by KLF4 sites, B) KLF4 binding by SOX2 sites, C) ESRRB binding by KLF4 sites, and D) KLF4 binding by ESRRB sites.

**Supplemental Fig S4: Expression of CREs with two types of binding sites.** The expression of CREs with four total binding sites and two types of binding site varies based on whether the binding sites are split 2-2 or 3-1.

**Supplemental Fig S5: Expression of Klf genes in overexpression conditions.** The expression level of *Klf2*, *Klf4*, and *Klf5* was measured by qRT-PCR in four overexpression conditions.

**Supplemental Fig S6: Predicted expression of KBS library.** The observed CRE-seq expression of each CRE in the KBS library in each overexpression condition, along with the expression predicted by the thermodynamic model.

**Supplemental Fig S7: Clusters of KLF4 binding sites function in the genome.** The number of KLF4 binding motifs was measured in 200bp genomic windows. The mean RNAP binding signal (A) and DHS signal (B) by number of KLF4 sites in all genomic windows, and in only those genomic windows within 10kb of a TSS (C) and (D). The red line indicates the number of sites found using the KLF4 PWM, and the blue line indicates the number of sites found using 10 permuted KLF4 PWMs. For each color, the middle line is the median and the ribbon represents the upper and lower quartile (the top and bottom of the box in a boxplot).
